# Supplementary material for: Accuracy of Digital Anthropometry During Pregnancy: A Longitudinal Study
Source: Research Square preprint supplement (doi:10.21203/rs.3.rs-7400356/v1), 2025-09-30
Supplement: Supplementary file 1 [file 05eaffafa63a6e6fa60a1358.docx]

**Supplemental Information**

**Accuracy of Digital Anthropometry During Pregnancy: A Longitudinal Study**

Sophia Ramirez1, Jasmine Brown1, Ryan Yang1, Marianna Deynzer2, Gabriela Lemos1, Cassidy McCarthy1, Sara Dube2, John Virostko2, Isaiah Janumala2, Amy R. Nichols2,3, Rachel Rickman2, Saralyn F. Foster2, Michelle Cassidy2, Steven B. Heymsfield1, Elizabeth M. Widen2

1Pennington Biomedical Research Center, LSU System, Baton Rouge, LA, USA; 2The University of Texas at Austin, Austin, TX, USA; 3University of California, Davis, Davis, CA, USA.

**Address Correspondence to:**

Elizabeth M. Widen, PhD, RD

Department of Nutritional Sciences

School of Human Ecology, College of Natural Sciences

Department of Women’s Health & Pediatrics, Dell Medical School

Dell Pediatric Research Institute

Population Research Center

1400 Barbara Jordan Blvd.

Austin, TX 78723

[elizabeth.widen@austin.utexas.edu](mailto:elizabeth.widen@austin.utexas.edu)

**Supplemental Figures**

**Figure S1.** Regression and Bland-Altman plots for mid-upper arm, mid-thigh, and calf circumferences at 15-weeks of gestation.
**Figure S2.** Regression and Bland-Altman plots for mid-upper arm, mid-thigh, and calf circumferences at 25-weeks of gestation. **Figure S3.** Regression and Bland-Altman plots for mid-upper arm, mid-thigh, and calf circumferences at 35-weeks of gestation.

**Figure S1**. Three-dimensional optical (3DO) versus flexible tape measurements (left panels) for mid-upper arm, mid-thigh, and calf circumferences and corresponding Bland-Altman plots (right panels) at 15-weeks of gestation. Simple linear regression models and R2s are shown in each of the plots on the left. All three regression analyses were statistically significant at p<0.001; dashed line is identity. Slope of Bland-Altman plot for mid-upper arm circumference was non-significant; slopes of Bland-Altman plots at mid-thigh and calf were significant at p<0.05; dashed lines are mean±1.96 SD and the bold horizontal line is the mean difference (MD) between 3D- and flexible tape-measured circumference, in cm.

**Figure S2**. Three-dimensional optical (3DO) versus flexible tape measurements (left panels) for mid-upper arm, mid-thigh, and calf circumferences and corresponding Bland-Altman plots (right panels) at 25-weeks of gestation. Simple linear regression models and R2s are shown in each of the plots on the left. All three regression analyses were statistically significant at p<0.001; dashed line is identity. Slope of Bland-Altman plot for mid-upper arm circumference was non-significant; slopes of Bland-Altman plots at mid-thigh and calf were significant at p<0.05; dashed lines are mean±1.96 SD and the bold horizontal line is the mean difference (MD) between 3D- and flexible tape-measured circumference, in cm.

**Figure S3**. Three-dimensional optical (3DO) versus flexible tape measurements (left panels) for mid-upper arm, mid-thigh, and calf circumferences and corresponding Bland-Altman plots (right panels) at 35-weeks of gestation. Simple linear regression models and R2s are shown in each of the plots on the left. All three regression analyses were statistically significant at p<0.001; dashed line is identity. Slopes of Bland-Altman plots were all non-significant; dashed lines are mean±1.96 SD and the bold horizontal line is the mean difference (MD) between 3D- and flexible tape-measured circumference, in cm.
